# Supplementary material for: Rapid analysis of tetracycline in honey by microwave plasma torch mass spectrometry with ablation samples
Source: Royal Society of Chemistry journal article supplement (doi:10.1039/c9ay01887e), 2020-01-01
Supplement: c9ay01887e1.pdf [file c9ay01887e1.pdf]

## 1 Supporting Materials

2

3 The study interpreted the  $m/z$  36 as  $[\text{H}_2\text{O-H-OH}]^+$ , and the literatures had been  
4 reported that microwave plasma torch (MPT) sources produced little or no ammonium  
5 ions. Some literatures proved  $[\text{H}_2\text{O-H-OH}]^+$ , such as [34]-[37] in main text. Moreover,  
6 we employed an auxiliary experiment, with experimental conditions keeping almost  
7 the same as the original experiment, including microwave power being 150W and  
8 discharge gas flow rate such as support gas being 600 mL/min and carrier gas being  
9 900 mL/min. In this auxiliary experiment, an aerosol produced by lead standard  
10 solution ( $10\mu\text{g}\cdot\text{L}^{-1}$ ) flowed across the plasma flame through the central cube of the  
11 MPT ion source, and were analyzed by a Time-of-Flight mass spectrometer (API-  
12 TOF MS 5000; Guangzhou Hexin Co., Ltd.) under positive ion detection mode. The  
13 generated adduct ions of lead were detected and identified, and the software of  
14 Molecular Weight Calculator was employed to analyze the exact molecular formulas.

15 The simulation result by the software of Molecular Weight Calculator showed  
16 that the ionic formula of  $m/z$  242.8692 should be  $[\text{}^{208}\text{Pb}(\text{OH})\text{H}_2\text{O}]^+$  but not  
17  $[\text{}^{208}\text{Pb}(\text{OH})\text{NH}_4]^+$  based on the natural isotope distribution of these elements,  
18 illustrating in Figure S1. The auxiliary result certified indirectly that was the hydrated  
19 ion, but not  $\text{NH}_4^+$ , which was dominant in the air-opened Ar-MPT plasma. Based on  
20 this result, we deduced the ions of  $m/z$  36 should be  $[\text{H}_2\text{O-H-OH}]^+$  but not any else.

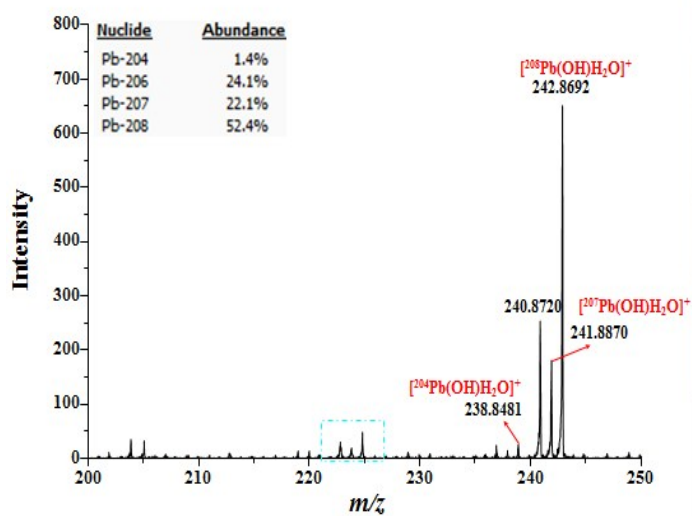

| Formula: PbOH <sub>2</sub> O |           |           |  |
|------------------------------|-----------|-----------|--|
| Mass                         | Fraction  | Intensity |  |
| 238.98632                    | 0.0139258 | 2.67      |  |
| 239.98632                    | 0.0000169 | 0.00      |  |
| 240.98632                    | 0.2397795 | 45.89     |  |
| 241.98632                    | 0.2201188 | 42.13     |  |
| 242.98632                    | 0.5224736 | 100.00    |  |
| 243.98632                    | 0.0015361 | 0.29      |  |
| 244.98632                    | 0.0021443 | 0.41      |  |
| 245.98632                    | 0.0000027 | 0.00      |  |
| 246.98632                    | 0.0000022 | 0.00      |  |

  

| Formula: PbOHNH <sub>4</sub> |           |           |  |
|------------------------------|-----------|-----------|--|
| Mass                         | Fraction  | Intensity |  |
| 239.01013                    | 0.0139042 | 2.66      |  |
| 240.01013                    | 0.0000671 | 0.01      |  |
| 241.01013                    | 0.2393786 | 45.86     |  |
| 242.01013                    | 0.2206418 | 42.27     |  |
| 243.01013                    | 0.5219643 | 100.00    |  |
| 244.01013                    | 0.0029650 | 0.57      |  |
| 245.01013                    | 0.0010738 | 0.21      |  |
| 246.01013                    | 0.0000048 | 0.00      |  |

  

| Formula: PbNH <sub>3</sub> H <sub>2</sub> O |           |           |  |
|---------------------------------------------|-----------|-----------|--|
| Mass                                        | Fraction  | Intensity |  |
| 239.01013                                   | 0.0139042 | 2.66      |  |
| 240.01013                                   | 0.0000671 | 0.01      |  |
| 241.01013                                   | 0.2393786 | 45.86     |  |
| 242.01013                                   | 0.2206418 | 42.27     |  |
| 243.01013                                   | 0.5219643 | 100.00    |  |
| 244.01013                                   | 0.0029650 | 0.57      |  |
| 245.01013                                   | 0.0010738 | 0.21      |  |
| 246.01013                                   | 0.0000048 | 0.00      |  |

Figure S1. Detection of the lead ions in aqueous by MPT-MS.

1  
2  
3  
4  
5
